# Supplementary material
Source: Frontiers journal article supplement (https://www.frontiersin.org/articles/297974)
Supplement: Data_Sheet_3.xlsx [file Data_Sheet_3.xlsx]

## Sheet: Immune Gene List
SV-BR-1-GM, a Clinically Effective GM-CSF-Secreting Breast Cancer Cell Line, Expresses an Immune Signature and Directly Activates CD4+ T Lymphocytes
Supplementary Data Sheets 3: Immunostimulatory Genes
		Pos. T cell or APC stimulation: observed or expected up-regulation of antigen-directed immune response.
Gene Symbol (NCBI)	Aliases (NCBI)	Positive T cell stimulation (Cell Surface Activators)	Positive T cell stimulation (Free Activators/Cytokines)	Positive APC Stimulation	Antigen Presentation	References (see separate tab)	Probe IDs (Human HT-12 v.4 BeadChip)				Notes
ADA	-	x				1, 14, 23	ILMN_1803686
ADGRE5	CD97, TM7LN1	(x)				1, 14, 15	ILMN_2413508	ILMN_1676718	ILMN_1673363		Probes annotated with "CD97" (Illumina HT-12 v.4 BeadChip).
B2M	IMD43				x	3, 36	ILMN_2148459	ILMN_1725427
CAV1	BSCL3, CGL3, LCCNS, MSTP085, PPH3, VIP21	x				1, 14, 21	ILMN_2149226	ILMN_1687583
CCL1	I-309, P500, SCYA1, SISe, TCA3		x			34	ILMN_2086965
CCL2	GDCF-2, HC11, HSMCR30, MCAF, MCP-1, MCP1, SCYA2, SMC-CF		x			34	ILMN_1720048
CCL3	G0S19-1, LD78ALPHA, MIP-1-alpha, MIP1A, SCYA3		x	x		11, 12, 33, 34	ILMN_1671509
CCL4	ACT2, AT744.1, G-26, HC21, LAG-1, LAG1, MIP-1-beta, MIP1B, MIP1B1, SCYA2, SCYA4		x	x		34	ILMN_1674563
CCL5	D17S136E, RANTES, SCYA5, SIS-delta, SISd, TCP228, eoCP		x	x		12, 29, 33, 34	ILMN_1773352	ILMN_2098126
CCL7	FIC, MARC, MCP-3, MCP3, NC28, SCYA6, SCYA7		x	x		34	ILMN_1683456
CCL8	HC14, MCP-2, MCP2, SCYA10, SCYA8		x			34	ILMN_1772964
CCL11	SCYA11		x			34	ILMN_1725519
CCL13	CKb10, MCP-4, NCC-1, NCC1, SCYA13, SCYL1		x			34	ILMN_1783593
CCL15	HCC-2, HMRP-2B, LKN-1, LKN1, MIP-1 delta, MIP-1D, MIP-5, MRP-2B, NCC-3, NCC3, SCYA15, SCYL3, SY15		x			34	ILMN_1740609	ILMN_1669034	ILMN_2255130	ILMN_1670658
CCL16	CKb12, HCC-4, ILINCK, LCC-1, LEC, LMC, Mtn-1, NCC-4, NCC4, SCYA16, SCYL4		x			34	ILMN_2045324
CCL17	A-152E5.3, ABCD-2, SCYA17, TARC		x			28, 33, 34	ILMN_1710186
CCL18	AMAC-1, AMAC1, CKb7, DC-CK1, DCCK1, MIP-4, PARC, SCYA18		x			33, 34	ILMN_1654411
CCL19	CKb11, ELC, MIP-3b, MIP3B, SCYA19		x	x		12, 33, 34	ILMN_1769129
CCL20	CKb4, Exodus, LARC, MIP-3-alpha, MIP-3a, MIP3A, SCYA20, ST38		x	x		11, 12, 34	ILMN_1657234
CCL21	6Ckine, CKb9, ECL, SCYA21, SLC, TCA4		x	x		34	ILMN_1677505
CCL22	A-152E5.1, ABCD-1, DC/B-CK, MDC, SCYA22, STCP-1		x			33, 34	ILMN_2160476
CCL23	CK-BETA-8, CKb8, Ckb-8, Ckb-8-1, MIP-3, MIP3, MPIF-1, SCYA23, hmrp-2a			x		34	ILMN_1764030	ILMN_1686109
CCL24	Ckb-6, MPIF-2, MPIF2, SCYA24		x			34	ILMN_1653766
CCL25	Ckb15, SCYA25, TECK	x	x			34	ILMN_1737817	ILMN_1782596
CCL26	IMAC, MIP-4a, MIP-4alpha, SCYA26, TSC-1		x			34	ILMN_1659601
CCL27	ALP, CTACK, CTAK, ESKINE, ILC, PESKY, SCYA27		x			34	ILMN_2113606
CCL28	CCK1, MEC, SCYA28		x			34	ILMN_1774087	ILMN_1701347	ILMN_2228845
CD40	Bp50, CDW40, TNFRSF5, p50	x				1, 14	ILMN_2367818	ILMN_1779257
CD40LG	CD154, CD40L, HIGM1, IGM, IMD3, T-BAM, TNFSF5, TRAP, gp39, hCD40L			x		4, 8, 13	ILMN_1659077
CD48	BCM1, BLAST, BLAST1, MEM-102, SLAMF2, hCD48, mCD48	(x)				1, 14, 16, 40	ILMN_2061043
CD58	LFA-3, LFA3, ag3	x				1, 14, 16	ILMN_1785268	ILMN_2147517
CD70	CD27L, CD27LG, TNFSF7, TNLG8A	x				1, 14	ILMN_1760247
CD74	DHLAG, HLADG, II, Ia-GAMMA				x	39	ILMN_1736567	ILMN_1761464	ILMN_2379644
CD80	B7, B7-1, B7.1, BB1, CD28LG, CD28LG1, LAB7	x				1, 14	ILMN_1716736
CD83	BL11, HB15	(x)				1, 2, 14, 24, 25	ILMN_1780582	ILMN_2328666
CD86	B7-2, B7.2, B70, CD28LG2, LAB72	x				1, 14	ILMN_1782560	ILMN_1714602	ILMN_1672097
CD209	CDSIGN, CLEC4L, DC-SIGN, DC-SIGN1	x				35	ILMN_1676372
CSF1	CSF-1, MCSF			(x)		8	ILMN_1733402	ILMN_1805930	ILMN_2302947
CSF2	GMCSF			x		7, 8	ILMN_1661861
CX3CL1	ABCD-3, C3Xkine, CXC3, CXC3C, NTN, NTT, SCYD1, fractalkine, neurotactin		x			34	ILMN_1654072
CXCL8	GCP-1, GCP1, IL8, LECT, LUCT, LYNAP, MDNCF, MONAP, NAF, NAP-1, NAP1		x			34	ILMN_1666733	ILMN_2184373			Probes annotated with "IL8" (Illumina HT-12 v.4 BeadChip).
CXCL9	CMK, Humig, MIG, SCYB9, crg-10		x			29, 33, 34	ILMN_1745356
CXCL10	C7, IFI10, INP10, IP-10, SCYB10, crg-2, gIP-10, mob-1		x	x		29, 33, 34	ILMN_1791759
CXCL11	H174, I-TAC, IP-9, IP9, SCYB11, SCYB9B, b-R1		x			29, 33, 34	ILMN_2067895	ILMN_2067890
CXCL13	ANGIE, ANGIE2, BCA-1, BCA1, BLC, BLR1L, SCYB13	x	x			33, 34	ILMN_1718552
CXCL16	CXCLG16, SR-PSOX, SRPSOX			x		34	ILMN_1672278	ILMN_1728478
EFNB2	EPLG5, HTKL, Htk-L, LERK5	x				1, 14, 22	ILMN_1703852
FASLG	ALPS1B, APT1LG1, APTL, CD178, CD95-L, CD95L, FASL, TNFSF6, TNLG1A			x		9	ILMN_1781824
FLT3LG	FL, FLT3L			x		8	ILMN_2091412
FN1	CIG, ED-B, FINC, FN, FNZ, GFND, GFND2, LETS, MSF	x				1, 14, 19, 20	ILMN_1778237	ILMN_1675646	ILMN_2366463
HGF	DFNB39, F-TCFB, HPTA, SF, HGF			x		8	ILMN_1757838	ILMN_1790149	ILMN_1801586
HLA-A	HLAA				x	36	ILMN_1671054	ILMN_2203950	ILMN_2165753		ILMN_2165753 represents HLA-A29.1.
HLA-B	AS, B-4901, HLAB				x	36	ILMN_1778401
HLA-C	D6S204, HLA-JY3, HLAC, HLC-C, MHC, PSORS1				x	36	ILMN_2150787	ILMN_1721113
HLA-DMA	D6S222E, DMA, HLADM, RING6				x	36	ILMN_1695311
HLA-DMB	D6S221E, RING7				x	36	ILMN_1761733
HLA-DOA	HLA-DNA, HLA-DZA, HLADZ				x	36	ILMN_1659075
HLA-DOB	DOB				x	36	ILMN_1700428
HLA-DPA1	DP(W3), DP(W4), HLA-DP1A, HLADP, HLASB, PLT1				x	36	ILMN_1772218
HLA-DPB1	DPB1, HLA-DP, HLA-DP1B, HLA-DPB				x	36	ILMN_1749070
HLA-DQA1	CELIAC1, DQ-A1, HLA-DQA				x	36	ILMN_1808405
HLA-DQA2	DX-ALPHA, HLA-DXA				x	36	ILMN_1680144
HLA-DQB1	CELIAC1, HLA-DQB, IDDM1				x	36	ILMN_1661266
HLA-DRA	HLA-DRA1				x	36	ILMN_1689655	ILMN_2157441
HLA-DRB1	DRB1, HLA-DR1B, HLA-DRB, SS1				x	36, 37	ILMN_1715169
HLA-DRB3	HLA-DR1B, HLA-DR3B				x	36, 37	ILMN_1717261				Probe does not seem specific for HLA-DRB3.
HLA-DRB4	DR4, DRB4, HLA-DR4B				x	36, 37	ILMN_1752592	ILMN_2159694
HLA-DRB5	-				x	36, 37	ILMN_1697499
HLA-F	CDA12, HLA-5.4, HLA-CDA12, HLAF				(x)	36, 38	ILMN_1762861	ILMN_2186806
ICAM1	BB2, CD54, P3.58	x				1, 14, 17	ILMN_1812226
ICAM2	CD102	x				1, 14, 17	ILMN_1786823
ICAM3	CD50, CDW50, ICAM-R	x				1, 14, 17	ILMN_2212763
ICOSLG	B7-H2, B7H2, B7RP-1, B7RP1, CD275, GL50, ICOS-L, ICOSL, LICOS	x				1, 14, 41	ILMN_1675671
IFNA2	IFNA; INFA2; IFNA2B; IFN-alphaA		x	x		31	ILMN_1698186
IFNA8	IFN-alphaB		x	x		31, 41, 42	ILMN_1678574	ILMN_2110561
IFNA10	IFN-alphaC		x			31, 42	ILMN_1769988
IFNG	IFG, IFI		x	x		7, 8	ILMN_2207291
IL1A	IL-1A, IL1, IL1-ALPHA, IL1F1		x	x		7, 8	ILMN_1658483
IL1B	IL-1, IL1-BETA, IL1F2		x	x		7, 8	ILMN_1775501
IL2	IL-2, TCGF, lymphokine		x	x		7, 26	ILMN_1704321
IL3	IL-3, MCGF, MULTI-CSF			x		8	ILMN_1766320
IL4	BCGF-1, BCGF1, BSF-1, BSF1, IL-4		x	x		7, 26	ILMN_1669174	ILMN_2389080
IL6	BSF-2, BSF2, CDF, HGF, HSF, IFN-beta-2, IFNB2, IL-6		x	(x)		7, 8, 29, 32, 43	ILMN_1699651
IL7	IL-7		x	x		7, 8	ILMN_2059744	ILMN_1705769
IL9	HP40, IL-9, P40		(x)			26, 27	ILMN_2151676	ILMN_1653704
IL10	CSIF, GVHDS, IL-10A, TGIF		(x)			7, 29, 30	ILMN_2073307	ILMN_1674167			Negative regulator of MHC class II expression.
IL12A	CLMF, IL-12A, NFSK, NKSF1, P35		x			7, 26, 29	ILMN_1671353
IL12B	CLMF, CLMF2, IL-12B, IMD28, IMD29, NKSF, NKSF2		x			7, 26, 29	ILMN_1681132
IL13	IL-13, P600			x		8	ILMN_2052511
IL15	IL-15		x	x		7, 8	ILMN_1724181	ILMN_2369221	ILMN_1785312	ILMN_2273053
IL16	LCF, NIL16, PRIL16, prIL-16			(x)		8	ILMN_2290628	ILMN_1813572
IL17A	CTLA-8, CTLA8, IL-17, IL-17A, IL17			x		8	ILMN_1774983
IL18	IGIF, IL-18, IL-1g, IL1F4		x			7, 29	ILMN_1778457
IL21	CVID11, IL-21, Za11		x			7	ILMN_1772674
IL23A	IL-23, IL-23A, IL23P19, P19, SGRF		x			7, 29	ILMN_1715603
KITLG	DCUA, DFNA69, FPH2, FPHH, KL-1, Kitl, MGF, SCF, SF, SHEP7			x		8, 32	ILMN_1808508	ILMN_2341595	ILMN_1746232
LAMP3	CD208, DC LAMP, DC-LAMP, DCLAMP, LAMP, LAMP-3, TSC403				x	10	ILMN_2170813	ILMN_2170814
MADCAM1	MACAM1	x				1, 14	ILMN_1767973	ILMN_1662824
MICA	MIC-A, PERB11.1	x				1, 14	ILMN_1797929
TNF	DIF; TNFA; TNFSF2; TNLG1F; TNF-alpha		x	x		7, 8, 26	ILMN_1728106
TNFRSF6B	DCR3, DJ583P15.1.1, M68, M68E, TR6		x			1, 14	ILMN_2331232	ILMN_1661825	ILMN_2331231
TNFSF4	CD134L, CD252, GP34, OX-40L, OX4OL, TNLG2B, TXGP1	x				1, 5, 14	ILMN_1746175	ILMN_2089875
TNFSF8	CD153, CD30L, CD30LG, TNLG3A	x				1, 14	ILMN_1761778
TNFSF9	4-1BB-L, CD137L, TNLG5A	x				1, 14	ILMN_1751464
TNFSF11	CD254, ODF, OPGL, OPTB2, RANKL, TNLG6B, TRANCE, hRANKL2, sOdf			x		6, 8	ILMN_1695900	ILMN_1673175	ILMN_1658713
TNFSF14	CD258, HVEML, LIGHT, LTg	x				1, 14	ILMN_1655414	ILMN_1661343	ILMN_2363392
TNFSF15	TL1, TL1A, TNLG1B, VEGI, VEGI192A	x				1, 14	ILMN_1759501	ILMN_2106380
TNFSF18	AITRL, GITRL, TL6, TNLG2A, hGITRL	x				1, 14	ILMN_1738335
VCAM1	CD106, INCAM-100	x				1, 14, 18	ILMN_2325763	ILMN_2307903	ILMN_1766955
XCL1	ATAC, LPTN, LTN, SCM-1, SCM-1a, SCM1, SCM1A, SCYC1	x	x			34	ILMN_2224955	ILMN_1718792
XCL2	SCM-1b, SCM1B, SCYC2	x	x			34	ILMN_1666257
		x: positive effects.
		(x): controversial, both pos. and neg. affects.

## Sheet: REFERENCES
References:
1	Leitner, The role of costimulatory pathways during the activation of human T cells, Dissertation (Ph.D. Thesis), 2011, University of Vienna, Austria
2	Bates et al., Dendritic cell CD83 homotypic interactions regulate inflammation and promote mucosal homeostasis, Mucosal Immunol. 2015;8(2):414-28
3	Yang and Yi, Killing tumor cells through their surface beta(2)-microglobulin or major histocompatibility complex class I molecules, Cancer. 2010 Apr 1;116(7):1638-45
4	Caux et al., Activation of human dendritic cells through CD40 cross-linking, J Exp Med. 1994;180(4):1263-72
5	Ohshima et al., Expression and function of OX40 ligand on human dendritic cells, J Immunol. 1997;159(8):3838-48
6	Wong et al., TRANCE (tumor necrosis factor [TNF]-related activation-induced cytokine), a new TNF family member predominantly expressed in T cells, is a dendritic cell-specific survival factor, J Exp Med. 1997;186(12):2075-80
7	Lee and Margolin, Cytokines in cancer immunotherapy, Cancers (Basel). 2011;3(4):3856-93
8	Zou and Tam, Cytokines in the generation and maturation of dendritic cells: recent advances, Eur Cytokine Netw. 2002;13(2):186-99
9	Rescigno et al., Fas engagement induces the maturation of dendritic cells (DCs), the release of interleukin (IL)-1beta, and the production of interferon gamma in the absence of IL-12 during DC-T cell cognate interaction: a new role for Fas ligand in inflammatory responses, J Exp Med. 2000;192(11):1661-8
10	Arruda et al., Dendritic cell-lysosomal-associated membrane protein (LAMP) and LAMP-1-HIV-1 gag chimeras have distinct cellular trafficking pathways and prime T and B cell responses to a diverse repertoire of epitopes, J Immunol. 2006;177(4):2265-75
11	He et al., CCL3 and CCL20-recruited dendritic cells modified by melanoma antigen gene-1 induce anti-tumor immunity against gastric cancer ex vivo and in vivo., J Exp Clin Cancer Res. 2010 Apr 27;29:37
12	Dieu et al., Selective recruitment of immature and mature dendritic cells by distinct chemokines expressed in different anatomic sites, J Exp Med. 1998 Jul 20;188(2):373-86
13	Ma and Clark, The role of CD40 and CD40L in Dendritic Cells, Semin Immunol. 2009 Oct; 21(5): 265–72
14	Leitner et al., Receptors and ligands implicated in human T cell costimulatory processes, Immunol Lett. 2010 Feb 16;128(2):89-97
15	Sutavani et al., CD55 costimulation induces differentiation of a discrete T regulatory type 1 cell population with a stable phenotype, J Immunol. 2013 Dec 15;191(12):5895-903
16	Gokhale et al., Immunosuppression by co-stimulatory molecules: inhibition of CD2-CD48/CD58 interaction by peptides from CD2 to suppress progression of collagen-induced arthritis in mice, Chem Biol Drug Des. 2013 Jul;82(1):106-18
17	Bleijs et al., Co-stimulation of T cells results in distinct IL-10 and TNF-alpha cytokine profiles dependent on binding to ICAM-1, ICAM-2 or ICAM-3, Eur J Immunol. 1999 Jul;29(7):2248-58
18	Damle and Aruffo, Vascular cell adhesion molecule 1 induces T-cell antigen receptor-dependent activation of CD4+T lymphocytes, Proc Natl Acad Sci U S A. 1991 Aug 1;88(15):6403-7
19	Rodriguez et al., T lymphocyte adhesion to fibronectin (FN): a possible mechanism for T cell accumulation in the rheumatoid joint, Clin Exp Immunol. 1992 Sep; 89(3): 439–45
20	Shimizu et al., Costimulation of proliferative responses of resting CD4+ T cells by the interaction of VLA-4 and VLA-5 with fibronectin or VLA-6 with laminin, J Immunol. 1990 Jul 1;145(1):59-67
21	Ohnuma et al., Caveolin-1 triggers T-cell activation via CD26 in association with CARMA1. J Biol Chem. 2007 Mar 30;282(13):10117-31
22	Luo et al., EphB6 crosslinking results in costimulation of T cells, J Clin Invest. 2002 Oct;110(8):1141-50
23	Mandapathil et al., CD26 expression and adenosine deaminase activity in regulatory T cells (Treg) and CD4(+) T effector cells in patients with head and neck squamous cell carcinoma, Oncoimmunology. 2012 Aug 1;1(5):659-69
24	Prazma and Tedder; Dendritic cell CD83: a therapeutic target or innocent bystander?, Immunol Lett. 2008 Jan 15;115(1):1-8
25	Hirano et al., Engagement of CD83 ligand induces prolonged expansion of CD8+ T cells and preferential enrichment for antigen specificity, Blood. 2006 Feb 15;107(4):1528-36
26	Turner et al., Cytokines and chemokines: At the crossroads of cell signalling and inflammatory disease, Biochim Biophys Acta. 2014 Nov;1843(11):2563-82
27	Goswami and Kaplan, A brief history of IL-9, J Immunol. 2011 Mar 15;186(6):3283-8
28	Imai et al., The T cell-directed CC chemokine TARC is a highly specific biological ligand for CC chemokine receptor 4, J Biol Chem. 1997 Jun 6;272(23):15036-42
29	Arango Duque and Descoteaux, Macrophage cytokines: involvement in immunity and infectious diseases, Front Immunol. 2014 Oct 7;5:491
30	Oft, IL-10: master switch from tumor-promoting inflammation to antitumor immunity, Cancer Immunol Res. 2014 Mar;2(3):194-9
31	Gibbert et al., IFN-α subtypes: distinct biological activities in anti-viral therapy, Br J Pharmacol. 2013 Mar;168(5):1048-58
32	Ray et al., Emerging functions of c-kit and its ligand stem cell factor in dendritic cells: regulators of T cell differentiation, Cell Cycle. 2008 Sep 15;7(18):2826-32
33	Lebre et al., Differential expression of inflammatory chemokines by Th1- and Th2-cell promoting dendritic cells: a role for different mature dendritic cell populations in attracting appropriate effector cells to peripheral sites of inflammation, Immunol Cell Biol. 2005 Oct;83(5):525-35
34	Le et al., Chemokines and chemokine receptors: their manifold roles in homeostasis and disease, Cell Mol Immunol. 2004 Apr;1(2):95-104
35	Geijtenbeek et al., Identification of DC-SIGN, a novel dendritic cell-specific ICAM-3 receptor that supports primary immune responses, Cell. 2000 Mar 3;100(5):575-85
36	Shiina et al., The HLA genomic loci map: expression, interaction, diversity and disease, J Hum Genet. 2009 Jan;54(1):15-39
37	Dorak et al., Increased heterozygosity for MHC class II lineages in newborn males, Genes Immun. 2002 Aug;3(5):263-9
38	Foroni et al., HLA-E, HLA-F and HLA-G — The Non-Classical Side of the MHC Cluster, Chapter 3 of HLA and Associated Important Diseases, book edited by Yongzhi Xi, ISBN 978-953-51-1230-3, Published: March 19, 2014 under CC BY 3.0 license. http://dx.doi.org/10.5772/57507
39	Fortin et al., Exposing the Specific Roles of the Invariant Chain Isoforms in Shaping the MHC Class II Peptidome, Front Immunol. 2013 Dec 13;4:443
40	Ezinne et al., HTLV-1 specific CD8+ T cell function augmented by blockade of 2B4/CD48 interaction in HTLV-1 infection, PLoS One. 2014 Feb 5;9(2):e87631
41	Gessani et al., Type I Interferons as Regulators of Human Antigen Presenting Cell Functions, Toxins (Basel). 2014 Jun; 6(6): 1696–723
42	Hillyer et al., Subtypes of type I IFN differentially enhance cytokine expression by suboptimally stimulated CD4(+) T cells, Eur J Immunol. 2013 Dec;43(12):3197-208
43	Lee et al., IL-6 receptor α defines effector memory CD8+ T cells producing Th2 cytokines and expanding in asthma, Am J Respir Crit Care Med. 2014 Dec 15;190(12):1383-94

## Sheet: Immune Signature Candidates
Immune Signature Candidates
		Arithmetic Means														STDEVs
Gene/Allele Name	Comment	d0_04h_IRR-GM (N=1, tech x 3)	d1_04h_IRR-GM (N=3)	d3_04h_IRR-GM (N=3)		d0_24h_IRR-GM (N=1, tech x 3)	d0_24h_NONIRR-GM (N=1, tech x 3)	d1_24h_IRR-GM (N=3)	d1_24h_NONIRR-GM (N=3)	d3_24h_IRR-GM (N=3)	d3_24h_NONIRR-GM (N=3)		HMEC (N=3)	SV-BR-1-GM (N=3)		d0_04h_IRR-GM (N=1, tech x 3)	d1_04h_IRR-GM (N=3)	d3_04h_IRR-GM (N=3)		d0_24h_IRR-GM (N=1, tech x 3)	d0_24h_NONIRR-GM (N=1, tech x 3)	d1_24h_IRR-GM (N=3)	d1_24h_NONIRR-GM (N=3)	d3_24h_IRR-GM (N=3)	d3_24h_NONIRR-GM (N=3)		HMEC (N=3)	SV-BR-1-GM (N=3)
ADA	Immune Signature	104.85	116.297	117.383		126.757	111.51	122.67	108.71	109.83	142.757		859.953	105.69		11.6055	5.46052	15.4997		18.8091	3.62989	6.37548	5.46506	14.2442	18.0253		47.4056	9.755
ADGRE5	Immune Signature	1413.35	1372.12	1134.45		1228.41	1356.48	1134.02	1101.89	1099.58	1134.94		303.257	886.05		23.8702	26.6526	16.763		64.6995	47.5078	38.2569	91.0542	19.1674	23.3947		38.7438	26.2463
B2M	Immune Signature	53726.2	56004.6	93755.6		76331.2	75365.8	64053.4	56688.1	89845.9	59586.9		25152.5	44114.3		378.485	240.738	2398.1		596.26	1447.69	899.936	2679.14	327.539	991.408		1380.08	536.826
CAV1	Immune Signature	236.213	684.323	390.583		182.26	193.537	1218.85	629.587	307.49	168.42		10667.4	138.367		1.20658	19.3235	2.6999		42.4078	21.0167	19.8375	53.0109	8.39164	27.479		556.425	20.1012
CD58	Immune Signature	710.603	885.213	906.933		978.573	929.633	969.94	705.847	1127.57	580.37		1492.63	424.237		22.48	20.9561	41.734		45.7557	70.2191	16.0203	41.3676	75.699	32.5777		79.6986	7.3961
CD74	Immune Signature	1447.34	1135.96	3220.69		2333.9	2337.34	1322.81	1419.77	2789.16	1697.93		235.48	1818.33		58.7109	20.2057	17.5039		33.6026	131.794	24.5829	173.6	57.7308	19.542		35.3965	28.2764
CD83	Immune Signature	3546.71	2730.17	3780.49		4463.8	4615.76	2690.38	2834.03	3422.68	4524.8		14.1867	1513.23		18.5085	9.33745	109.932		164.677	144.79	20.3397	127.436	112.16	116.726		12.0168	38.9176
CSF2	Immune Signature	5.36667	7.62667	1.72		4.52667	4.70667	5.26667	6.80667	5.12667	7.88667		4.48333	3.31333		2.11947	4.47643	1.24708		2.79665	2.83895	0.79758	4.95883	3.60457	4.75685		4.2119	3.44291
CXCL16	Immune Signature	266.667	388.21	413.27		225.553	238.017	318.557	298.24	460.2	252.803		410.657	250.937		9.36218	4.51372	39.3119		30.7532	13.1645	23.9823	22.5155	39.2673	15.5278		20.8082	5.48746
CXCL8	Immune Signature	53.6667	1555.75	387.52		106.21	119.887	1553.76	606.173	685.907	79.1633		112.95	15.0767		6.58309	43.2174	8.29525		10.7719	8.15481	23.2784	64.4228	40.7403	7.7977		10.2118	3.20204
HLA-A*11:01	Immune Signature	1	1	1		1.51667	1.60333	1.04	1.14	1.20667	1.06		2184.85	1.37333		0	0	0		0.25482	0.427239	0.069282	0.122882	0.181475	0.103923		91.4211	0.341516
HLA-A*24:02	Immune Signature	15263.6	15463.9	22005.4		22561.4	21277.1	16759.6	16304.8	19312.1	17753.9		3399.09	13627.1		95.8437	258.099	215.949		313.387	516.575	323.268	379.189	417.371	323.464		35.0616	250.075
HLA-B*35:08	Immune Signature	4558.83	5463.66	9601.78		6466.06	5884.76	5321.1	5016.36	8802.34	5683.46		4031.86	6122.61		111.487	76.4749	134.806		182.031	174.551	168.812	425.383	501.516	96.6899		23.1528	199.979
HLA-B*55:01	Immune Signature	5072	5892.98	10136.9		7558.72	6912.07	6204.35	5775.42	9021.03	6225.16		1795.78	5838.87		31.2543	66.2935	315.736		339.975	115.575	108.886	232.298	718.533	151.028		96.0274	146.321
HLA-DMA	Immune Signature	464.167	303.03	625.043		612.47	559.137	295.7	311.257	602.46	350.307		13.2267	316.53		12.6993	15.9689	14.5359		65.4615	44.4857	18.872	21.5459	17.1616	30.2976		9.23402	10.7345
HLA-DMB	Immune Signature	66.1033	37.9367	120.277		90.4733	68.5533	40.2633	51.8467	141.057	55.1167		1.89	54.0733		6.14902	7.64495	19.0329		5.49015	11.5761	8.87685	8.58939	3.94974	9.80631		0.457384	7.10848
HLA-DRA	Immune Signature	1401.79	1035.65	2790.83		3032.6	2842.15	1735.96	1475.48	2786.05	1254.26		1.89	1277.76		36.3271	23.643	73.5414		85.8852	70.5896	54.1885	141.351	86.6517	36.524		0.457384	18.9266
HLA-DRB3*01:01	Immune Signature	157.84	113.63	419.953		398.257	376.99	207.297	181.687	427.35	165.243		1.89	181.607		5.97161	2.59	7.87833		34.9044	7.8167	21.5121	28.5555	11.8479	21.1612		0.457384	10.5905
HLA-DRB3*02:02	Immune Signature	125.893	96.6633	312.62		267.763	249.987	154.54	117.923	284.767	125.803		7.93333	138.363		3.43846	8.10217	14.3092		43.973	26.5041	5.24346	23.8864	20.9531	13.8135		5.56717	14.8922
HLA-F	Immune Signature	313.673	345.11	590.483		505.26	447.913	452.263	419.997	598.2	400		126.41	265.963		25.9851	4.56457	31.0702		29.4362	49.9073	6.94933	44.012	42.2452	19.729		31.1549	13.371
ICAM3	Immune Signature	597.813	411.61	357.643		546.64	544.923	450.573	450.41	430.773	318.377		149.277	347.583		8.51892	9.73158	4.46782		34.7511	17.8199	30.287	12.5338	23.6835	13.1429		18.812	16.2509
IL10	Expression NOT confirmed	1	1	1		1.51667	1.60333	1.04	1.14	1.20667	1.06		1.89	1.37333		0	0	0		0.25482	0.427239	0.069282	0.122882	0.181475	0.103923		0.457384	0.341516
IL15	Immune Signature	647.167	506.127	885.72		877.703	839.33	556.677	712.167	834.747	923.483		32.95	687.847		24.9905	8.50111	12.4624		16.7474	55.9722	25.2667	22.2146	52.3666	119.33		16.607	19.1272
IL18	Immune Signature	323.827	973.067	665.09		350.053	367.557	1430.58	684.903	711.763	362.78		626.81	238.813		27.1243	6.38483	10.2357		7.22745	9.54639	35.0974	30.1533	23.8678	42.6066		8.24766	22.3632
IL6	Immune Signature	1806.66	4722.88	4293.37		3880.87	3658.92	5913.47	2977.05	3089.51	8647.1		1.89	819.13		46.9079	85.5908	95.5258		133.047	65.9687	196.301	138.75	11.63	2036.88		0.457384	25.7536
KITLG	Immune Signature	3634.31	2410.03	3327.01		3521.96	4109.64	3303.15	3829.03	3112.37	3108.57		1939.93	3799.93		55.6477	81.3793	133.312		38.8757	37.7095	48.0692	384.957	61.7931	654.319		132.455	85.0064
TNFSF14	Expression NOT confirmed	9.63667	7.36	1		15.5567	19.3633	8.76667	6.97333	3.33333	5.21333		1.89	5.55667		7.69429	1.62576	0		9.28847	7.98091	0.980833	4.98384	3.75086	1.99229		0.457384	2.4364
HLA-DRB1	Verification of lack of expression	1	1	1.19333		4.76667	5.72667	1.04	1.14	4.74667	1.06		1.89	1.37333		0	0	0.334863		5.52426	5.251	0.069282	0.122882	4.27928	0.103923		0.457384	0.341516
HLA-DRB6	Pseudogene	1	1	1		1.98333	1.60333	2.52667	1.14	1.20667	1.06		1.89	1.37333		0	0	0		0.735482	0.427239	2.64426	0.122882	0.181475	0.103923		0.457384	0.341516
